# Supplementary material for: Rhodium complexes stabilized by phosphine-functionalized phosphonium ionic liquids used as higher alkene hydroformylation catalysts: influence of the phosphonium headgroup on catalytic activity
Source: Royal Society of Chemistry journal article supplement (doi:10.1039/c2dt31797d), 2012-01-01
Supplement: c2dt31797d.pdf [file c2dt31797d.pdf]

**Supplementary Material to: Higher Alkene Hydroformylation Catalyzed by Rhodium Complexes Stabilized by Phosphine Functionalized Phosphonium Ionic Liquids: Influence of the Phosphonium Headgroup on Catalytic Activity**

Kylie L. Luska, Karl Z. Demmans, Samantha A. Stratton and Audrey Moores

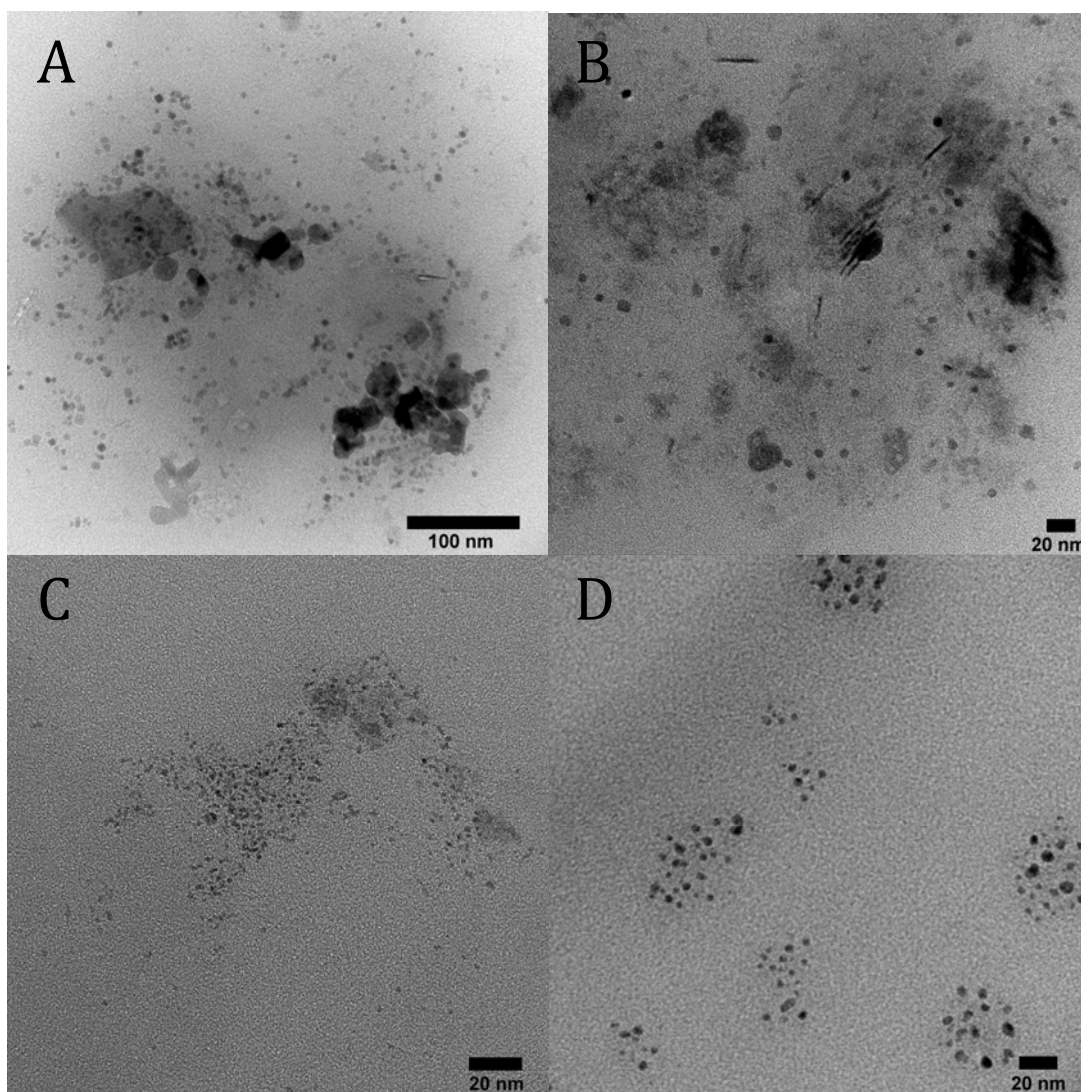

**Fig. S1.** TEM images of catalyst solutions prepared from  $[\text{Rh}(\text{acac})(\text{CO})_2]$  and PFIL **1** in  $[\text{TBP}]\text{NTf}_2$  after one catalytic cycle having a PFIL **1**/Rh ratio of (A) 2, (B) 4, (C) 8 and (D) 12.

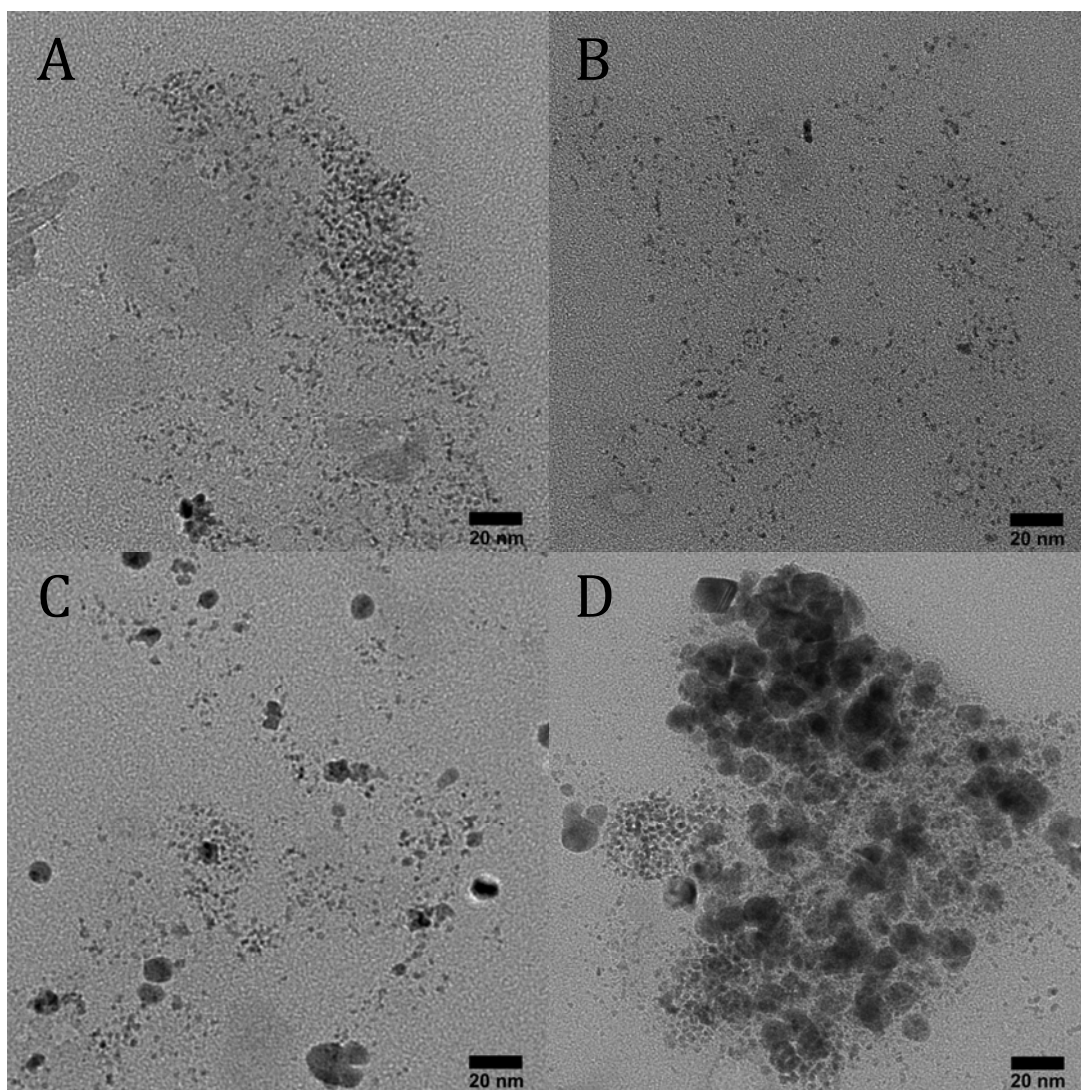

**Fig. S2.** TEM images of catalyst solutions prepared from  $[\text{Rh}(\text{acac})(\text{CO})_2]$  in  $[\text{TBP}]\text{NTf}_2$  after five catalytic cycles stabilizing by (A) PFIL **1**, (B) PFIL **2**, (C) PFIL **3** and (D)  $\text{PPh}_3$  (for phosphine/Rh = 8).
